# Supplementary material for: Cyclone enhances the contribution of oceanic dimethyl sulfide to the free troposphere over the Southern Ocean
Source: Copernicus journal article supplement (doi:10.5194/egusphere-2025-1622), 2025-05-19
Supplement: Supplementary file 1 [file egusphere-2025-1622-supplement.pdf]

Supporting information for

# **Cyclone enhances the contribution of oceanic dimethyl sulfide to the free troposphere over the Southern Ocean**

Miming Zhang <sup>\*1</sup>, Haipeng Gao<sup>1</sup>, Shanshan Wang<sup>1</sup>, Yue Jia<sup>\*2</sup>, Shibo Yan<sup>1</sup>, Rong Tian<sup>1</sup>, Jinpei Yan<sup>1</sup>,  
Yanfang Wu<sup>3</sup>

1. Key Laboratory of Global Change and Marine-Atmospheric Chemistry of Ministry of Natural Resources (MNR), Third Institute of Oceanography, MNR, Siming District, Xiamen, Fujian 361005, PR China
2. School of Natural Sciences and Mathematics, University of Texas at Dallas, USA
3. Department of Chemistry, University of Otago, Dunedin 9016, New Zealand

**Corresponding author:** Miming Zhang, E-mail: zhangmiming@tio.org.cn

Yue Jia, E-mail: yue.jia@utdallas.edu

**Support information: Figure S1-S6** 

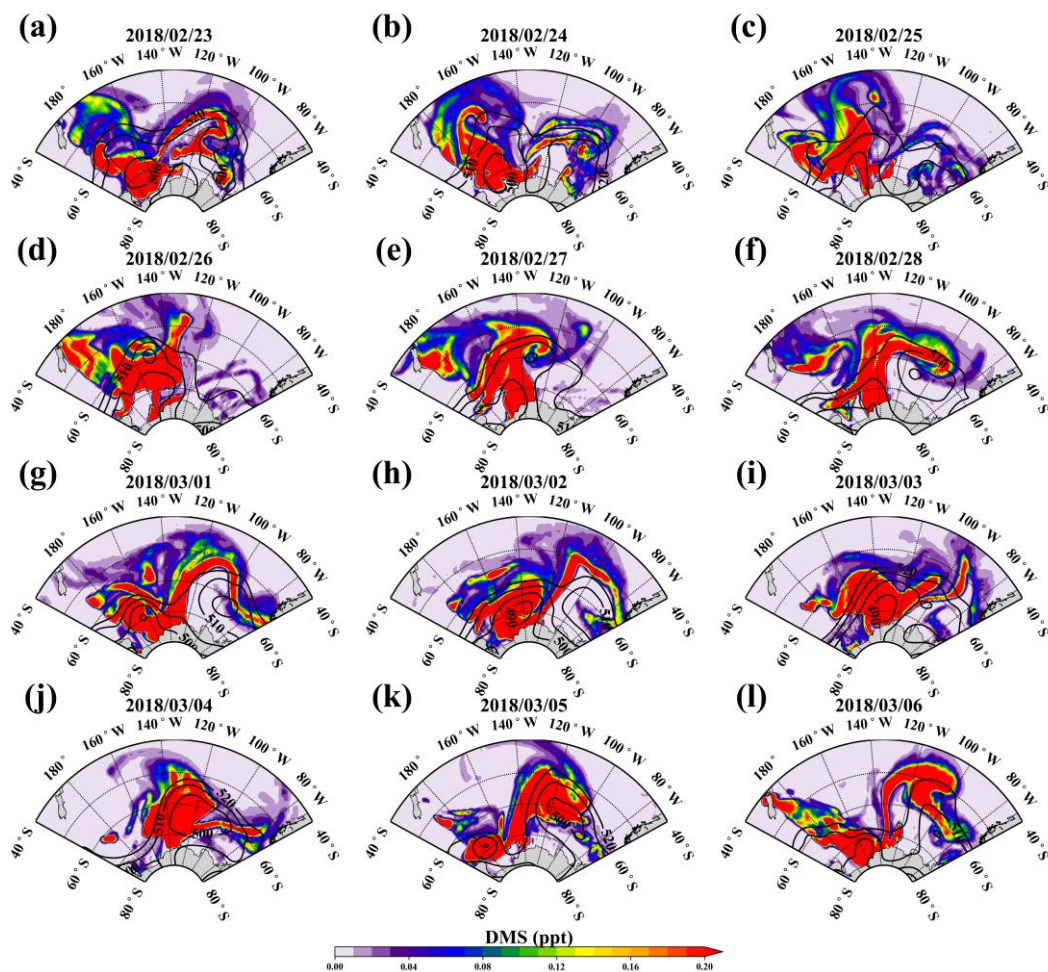

**Figure S1.** The daily simulation results of the distribution of atmospheric DMS at 1 km using the CHINARE's campaign DMS emission. (a - l) the results of different investigation periods. Note that the mean 500 hPa geopotential air pressures are presented in the background.

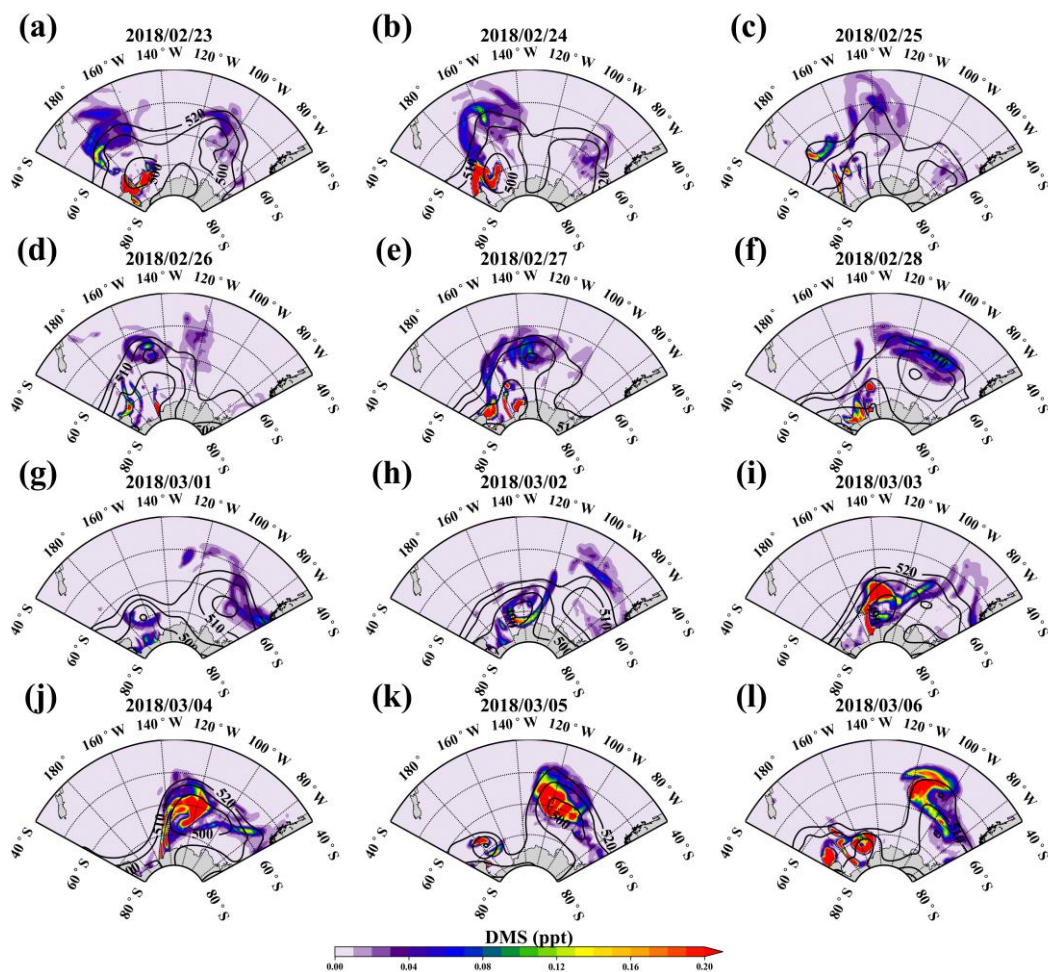

**Figure S2.** The daily simulation results of the distribution of atmospheric DMS at 3 km using the CHINARE's campaign DMS emission. (a - l) the results of different investigation periods. Note that the mean 500 hPa geopotential air pressures are presented in the background.

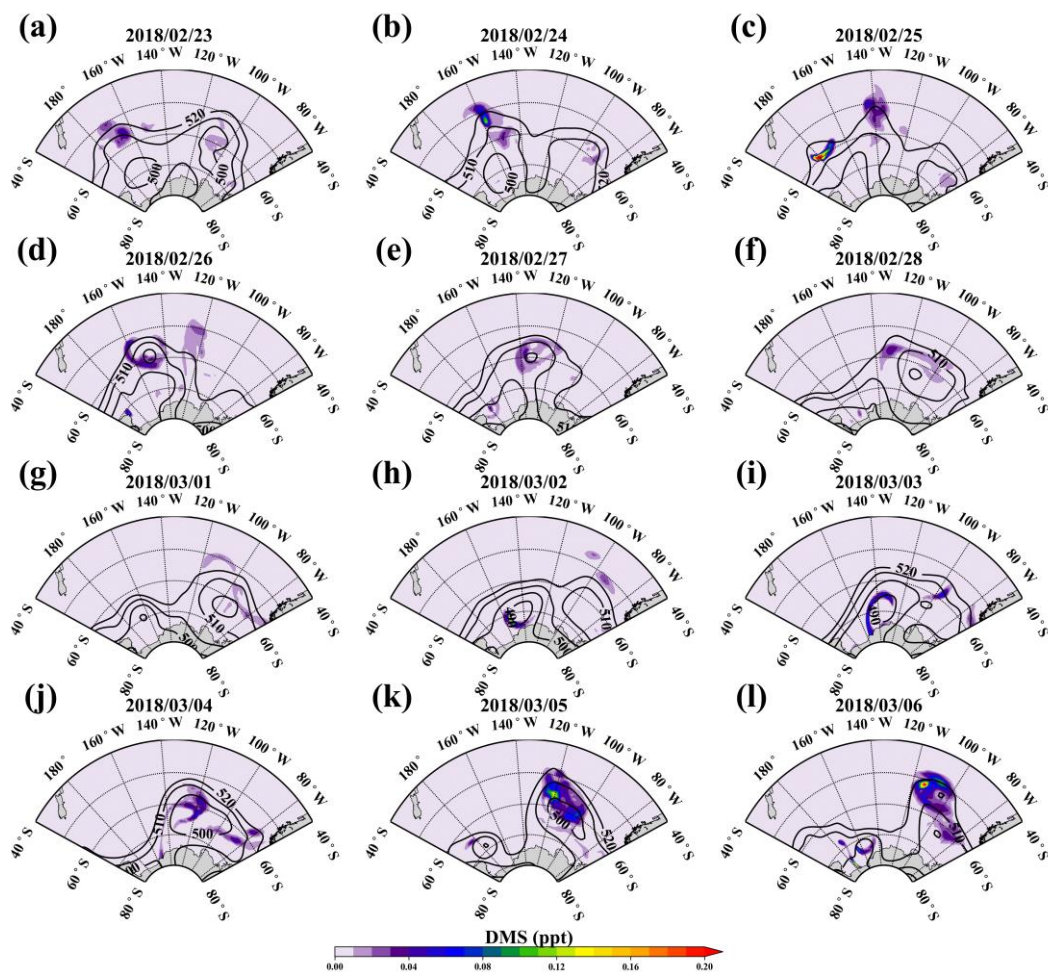

**Figure S3.** The daily simulation results of the distribution of atmospheric DMS at 5 km using the CHINARE's campaign DMS emission. (a - l) the results of different investigation periods. Note that the mean 500 hPa geopotential air pressures are presented in the background.

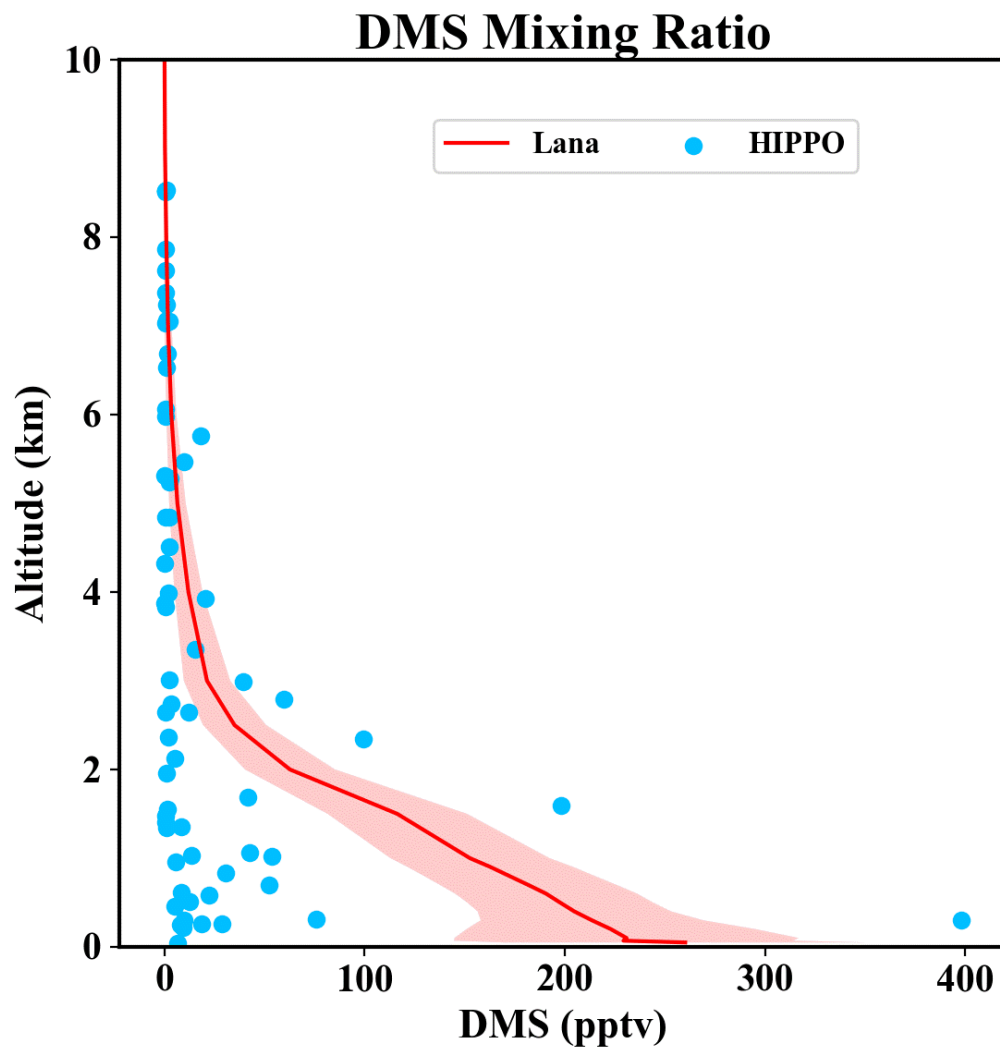

**Figure S4.** The comparison of the modelling results of mean DMS mixing ratio using the Lana's climatology near the ocean of New Zealand and HIPPO flight measurement data.



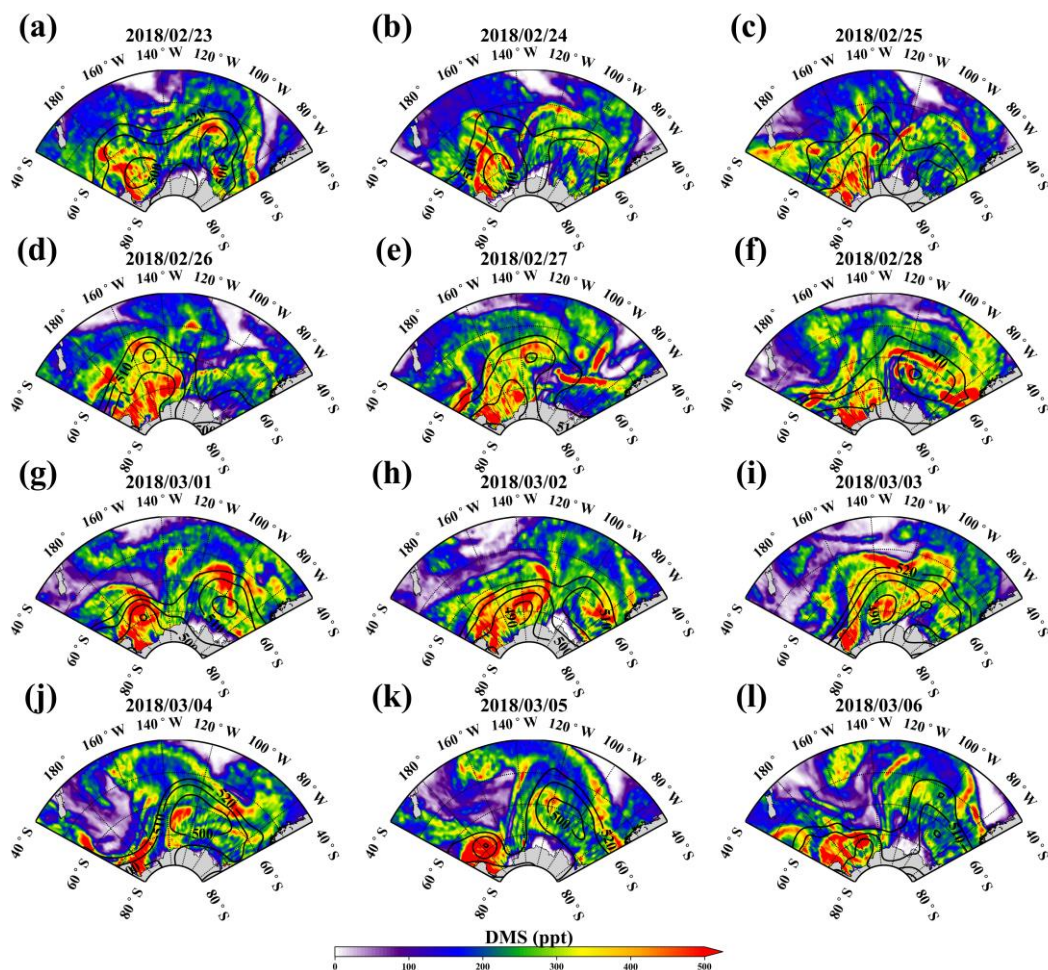

**Figure S5.** The daily simulation results of the distribution of atmospheric DMS at 1km using Lana's emission climatology. (a - l) the results of different investigation periods. Note that the mean 500 hPa geopotential air pressures are presented in the background.

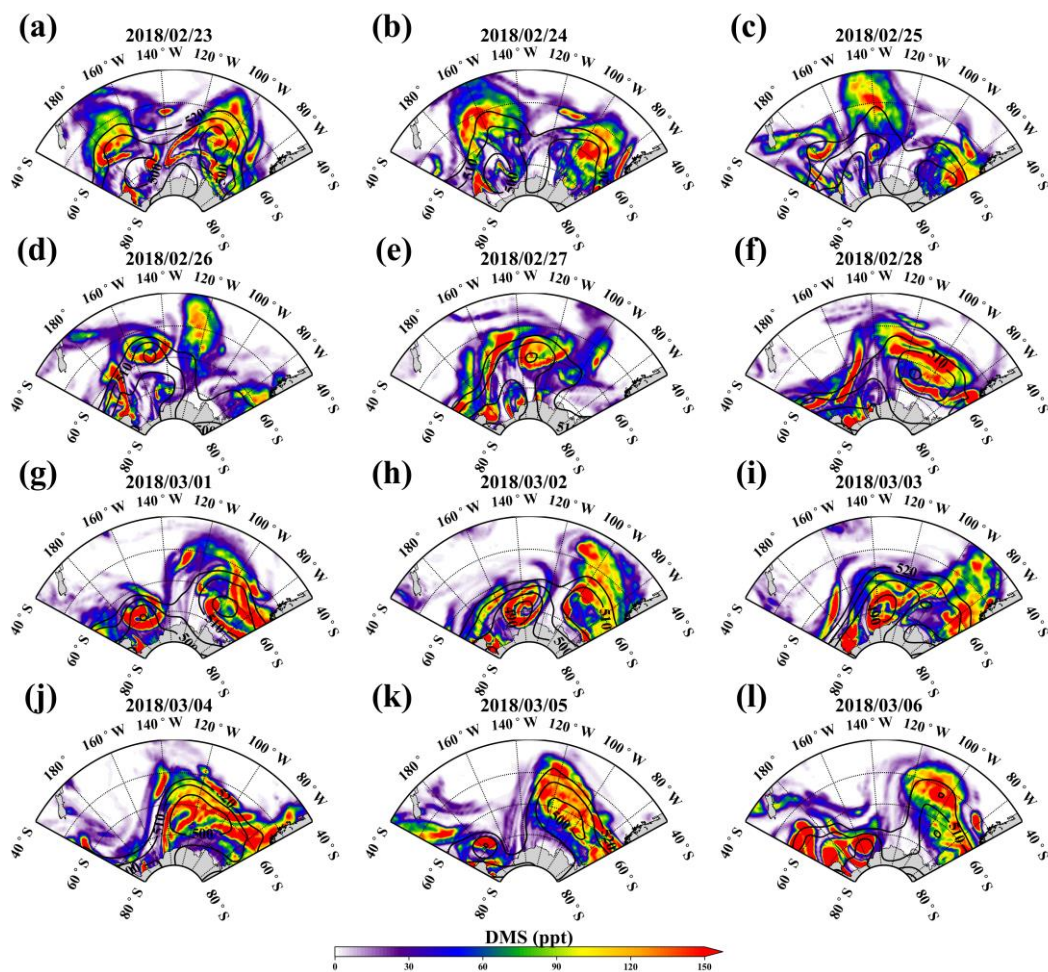

**Figure S6.** The daily simulation results of the distribution of atmospheric DMS at 3 km using Lana's emission climatology. (a - l) the results of different investigation periods. Note that the mean 500 hPa geopotential air pressures are presented in the background.
